# Supplementary material for: Identification and Verification of Feature Immune-Related Genes in Patients With Hypertrophic Cardiomyopathy Based on Bioinformatics Analyses
Source: Front Cardiovasc Med. 2021 Oct 26;8:752559. doi: 10.3389/fcvm.2021.752559 (PMC8577723; doi:10.3389/fcvm.2021.752559)
Supplement: Supplementary file 4 [file Table_3.XLSX]

## Sheet: Sheet1
ID	Description	GeneRatio	BgRatio	pvalue	p.adjust	qvalue	geneID	Count
hsa04610	Complement and coagulation cascades	22/370	85/8108	1.55128e-11	4.37461e-09	3.87004e-09	VSIG4/C1QB/C1QC/C3AR1/ITGB2/SERPINA5/CR1/C1QA/ITGAM/F13A1/C3/F8/PROCR/C2/C1R/SERPINE1/PLAU/C5AR1/MASP2/C7/PLAUR/C1S	22
hsa05150	Staphylococcus aureus infection	22/370	96/8108	2.0595e-10	2.9039e-08	2.56896e-08	C1QB/C1QC/C3AR1/ITGB2/FCGR3A/C1QA/ITGAM/KRT19/C3/FPR1/C2/C1R/FPR3/FCGR2A/C5AR1/SELPLG/KRT18/MASP2/FCGR1A/PTAFR/C1S/FCGR2B	22
hsa04145	Phagosome	21/370	152/8108	4.91374e-06	0.000461892	0.000408617	CYBB/ITGB2/CD14/FCGR3A/TUBA3D/TUBA3E/MARCO/ITGAM/TLR2/C3/CTSS/CD209/MSR1/TFRC/C1R/FCGR2A/TUBA1C/FCGR1A/CORO1A/THBS4/FCGR2B	21
hsa04613	Neutrophil extracellular trap formation	23/370	190/8108	1.6497e-05	0.00103478	0.000915426	CYBB/ITGB2/FCGR3A/CR1/TLR8/ITGAM/SIGLEC9/SYK/TLR2/C3/FPR1/FPR3/FCGR2A/AQP9/C5AR1/SELPLG/PRKCB/FCGR1A/GP1BA/TLR7/RAC2/H2AC13/AGER	23
hsa04380	Osteoclast differentiation	18/370	128/8108	1.83472e-05	0.00103478	0.000915426	FCGR3A/IL1R1/LILRB1/SYK/TYROBP/LILRB4/CSF1R/SPI1/JUN/FCGR2A/SOCS3/BTK/LILRB3/FCGR1A/TNFRSF11A/FCGR2B/FOSL1/ACP5	18
hsa05133	Pertussis	13/370	76/8108	3.36464e-05	0.00158138	0.00139898	C1QB/C1QC/ITGB2/CD14/C1QA/ITGAM/C3/C2/C1R/JUN/IRF8/C1S/NLRP3	13
hsa04933	AGE-RAGE signaling pathway in diabetic complications	15/370	100/8108	4.25418e-05	0.00171383	0.00151615	CYBB/CCL2/SERPINE1/JUN/FN1/JAK2/EGR1/PRKCB/EDN1/PLCE1/COL1A1/SELE/AGTR1/COL3A1/AGER	15
hsa05171	Coronavirus disease - COVID-19	25/370	232/8108	5.24964e-05	0.0018505	0.00163706	C1QB/C1QC/CYBB/C3AR1/C1QA/TLR8/SYK/F13A1/TLR2/ACE/C3/CCL2/C2/C1R/JUN/FCGR2A/C5AR1/MASP2/C7/PRKCB/TLR7/C1S/RPL22L1/AGTR1/NLRP3	25
hsa05152	Tuberculosis	21/370	180/8108	6.66799e-05	0.00208931	0.00184832	ITGB2/CD14/FCGR3A/CR1/FCER1G/ITGAM/SYK/TLR2/C3/CTSS/CD209/VDR/FCGR2A/IL10RA/JAK2/TLR1/FCGR1A/CORO1A/FCGR2B/IL18/NOD2	21
hsa04666	Fc gamma R-mediated phagocytosis	14/370	97/8108	0.000117262	0.0033068	0.00292539	FCGR3A/VAV1/SYK/HCK/PTPRC/FCGR2A/PLA2G4F/PRKCB/FCGR1A/WASF1/WAS/FCGR2B/AMPH/RAC2	14
hsa05140	Leishmaniasis	12/370	77/8108	0.00017068	0.00417685	0.00369509	CYBB/ITGB2/FCGR3A/CR1/ITGAM/TLR2/C3/JUN/FCGR2A/JAK2/PRKCB/FCGR1A	12
hsa04060	Cytokine-cytokine receptor interaction	28/370	295/8108	0.000177738	0.00417685	0.00369509	CCR1/IL1R1/IL1RL1/OSMR/IL20RA/CCL2/ACKR3/CSF1R/CCL11/IL10RA/IL18R1/NGFR/CXCR6/IL31RA/IL15RA/IL2RG/BMP8B/TNFRSF11A/LIF/CCL21/MSTN/TNFRSF8/IL18/TNFRSF25/INHA/BMP8A/INHBA/TNFSF8	28
hsa05221	Acute myeloid leukemia	11/370	67/8108	0.000197674	0.00428799	0.00379341	CD14/EIF4EBP1/ITGAM/PER2/CSF1R/SPI1/KIT/FCGR1A/CCNA2/ZBTB16/LEF1	11
hsa04974	Protein digestion and absorption	13/370	103/8108	0.000773204	0.0155745	0.0137781	COL11A1/COL9A1/SLC7A7/COL5A2/KCNJ13/COL7A1/MME/COL1A1/COL16A1/COL24A1/COL11A2/COL3A1/COL10A1	13
hsa04662	B cell receptor signaling pathway	11/370	82/8108	0.00116746	0.0219483	0.0194167	LILRB1/VAV1/SYK/PIK3AP1/LILRB4/JUN/BTK/LILRB3/PRKCB/FCGR2B/RAC2	11
hsa05144	Malaria	8/370	50/8108	0.001739	0.0288852	0.0255536	ITGB2/CR1/TLR2/CCL2/THBS4/SELE/IL18/KLRK1	8
hsa04640	Hematopoietic cell lineage	12/370	99/8108	0.00174131	0.0288852	0.0255536	CD14/CR1/ITGAM/IL1R1/TFRC/CSF1R/KIT/CD8A/FCGR1A/MME/GP1BA/CD33	12
hsa05146	Amoebiasis	12/370	102/8108	0.00225135	0.0352712	0.031203	ITGB2/CD14/ITGAM/IL1R1/TLR2/FN1/LAMB3/PRKCB/GNA15/COL1A1/COL3A1/LAMA1	12
hsa00770	Pantothenate and CoA biosynthesis	5/370	22/8108	0.0026648	0.0395512	0.0349893	BCAT1/GADL1/CSAD/VNN1/VNN2	5
hsa05134	Legionellosis	8/370	57/8108	0.00405623	0.0562026	0.0497201	ITGB2/CD14/CR1/ITGAM/TLR2/C3/IL18/HSPA2	8
hsa04611	Platelet activation	13/370	124/8108	0.0041853	0.0562026	0.0497201	PTGS1/FCER1G/SYK/TBXAS1/FCGR2A/VAMP8/APBB1IP/BTK/PLA2G4F/PIK3R5/GP1BA/COL1A1/COL3A1	13
